# Supplementary material for: Impact of hypertension on short- and long-term survival of patients who underwent emergency surgery for type A acute aortic dissection
Source: PubMed Central journal article supplement — J Thorac Dis. 2020 Nov;12(11):6618–28. doi: 10.21037/jtd-20-2336 (PMC7711364; doi:10.21037/jtd-20-2336), 2020-11
Supplement: jtd-12-11-6618-dss.pdf [file jtd-12-11-6618-dss.pdf]

## Data Sharing Statement

|                     |                                                                                                                                                    |                                                                                                                                      |
|---------------------|----------------------------------------------------------------------------------------------------------------------------------------------------|--------------------------------------------------------------------------------------------------------------------------------------|
| <b>Article Info</b> | http://dx.doi.org/10.21037/jtd-20-2336.                                                                                                            |                                                                                                                                      |
| <b>Item</b>         | <b>Question</b>                                                                                                                                    | <b>Authors' Response<br/>(place "-" if not applicable)</b>                                                                           |
| 1                   | Would you like to share data collected for your study to others?                                                                                   | Yes                                                                                                                                  |
| 2                   | If not, would you like to share the reason for your decision?                                                                                      | -                                                                                                                                    |
| 3                   | What data in particular will be shared?                                                                                                            | Individual participant data that underlie the results reported in this article, after de-identification (text, tables, and figures). |
| 4                   | Any other documents will be share? Such as study protocol, statistical analysis plan, informed consent form, clinical study report, analytic code. | Yes                                                                                                                                  |
| 5                   | When will data availability begin?                                                                                                                 | 3 months starting from the article publication.                                                                                      |
| 6                   | When will data availability end?                                                                                                                   | 12 months after the article publication.                                                                                             |
| 7                   | To whom will you share the data?                                                                                                                   | Cardiac surgeons who are interested in studies of aortic dissection.                                                                 |
| 8                   | For what type of analysis or purpose?                                                                                                              | To achieve aims in the approved proposal.                                                                                            |
| 9                   | How or where can the data/documents be obtained?                                                                                                   | Proposals should be directed to <a href="mailto:glyywdj@163.com">glyywdj@163.com</a> to gain access and data.                        |
| 10                  | Any other restrictions?                                                                                                                            | We may balance the potential benefits and risks for each request and then provide the data that could be shared.                     |
